# Supplementary material
Source: publisher figshare collection journal article supplement (https://acs.figshare.com/ndownloader/files/11863937)
Supplement: Supplementary file 1 [file 11863937]

# Supporting Information

## Functional Covalent Layer-by-Layer Thin Films by [2+2] Cycloaddition– Retroelectrocyclization

*Hiroyuki Fujita<sup>†</sup> and Tsuyoshi Michinobu<sup>\*,†</sup>*

*<sup>†</sup>Department of Organic and Polymeric Materials, Tokyo Institute of Technology,*

*2-12-1 Ookayama, Meguro-ku, Tokyo 152-8552, Japan*

## Materials

All reagents were used without further purification. 4-(4'-*N,N*-Dihexylaminophenylethynyl)styrene<sup>1</sup> and TCNQ polyester<sup>2</sup> (**P2**) ( $M_n$  (GPC, THF) 4600;  $M_w/M_n$  1.56;  $T_{d5\%}$  324 °C) were prepared according to the reported procedure.

## General measurements

NMR spectra were recorded on a JEOL model AL300 spectrometer at 20 °C. Deuterated chloroform was used as a solvent. Chemical shifts are reported in ppm (parts per million) using either tetramethylsilane (TMS) or residual solvent signals as an internal reference. The resonance multiplicity is described as s (singlet) and m (multiplet). Infrared (IR) spectra were recorded on a JASCO FT/IR-4100 spectrometer in the range from 4000 to 600  $\text{cm}^{-1}$ . Gel permeation chromatography (GPC) was measured on a JASCO system (PU-2080, CO-2065, RI-2031, and AS-2055) equipped with polystyrene gel column (Shodex KF-804L) using THF as an eluent at the flow rate of 1.0  $\text{mL min}^{-1}$  after calibration with standard polystyrenes. UV-vis-near IR absorption spectra were recorded on an Agilent HP8453 spectrophotometer. Thermogravimetric analysis (TGA) was carried out on a Rigaku TG8120 under nitrogen flow at the heating rate of 10 °C  $\text{min}^{-1}$ . Water contact angle measurements were made on a Surface & Electro-Optics Phoenix 150/300 Contact Angle Analyzer with 1 drop of de-ionized water. Film thicknesses were determined by a KLA Tencor Alpha-Step D-100 stylus profiler. Electrochemistry measurements were carried out on a BAS electrochemical analyzer model 612C at 20 °C in a classical three-electrode cell. The working, reference, and auxiliary electrodes were an ITO electrode, Ag/AgNO<sub>3</sub>/CH<sub>3</sub>CN/(*n*C<sub>4</sub>H<sub>9</sub>)<sub>4</sub>NClO<sub>4</sub>, and a Pt wire, respectively. All potentials are referenced to the ferrocene/ferricinium (Fc/Fc<sup>+</sup>) couple used as an internal standard. Atomic force microscope (AFM) images were taken by using a Seiko Instruments Nanocute.

## Synthesis

**P1:** To an ampoule tube, 4-(4'-*N,N*-dihexylaminophenylethynyl)styrene (1.708 g, 4.409 mmol), a solution of 2,2'-azobis(isobutyronitrile) in benzene (0.11 M, 0.40 mL), and benzene (4.41 mL) were added. The tube was attached to a vacuum line, freeze pump thaw 10 times, sealed off, and then heated to 60 °C for 60 h. After cooling to room temperature, the mixture was poured into a large excess of methanol. The precipitate was dissolved in dichloromethane (20 mL) and poured into methanol again. The precipitate was collected as yellow solid (1.461 g, 85.5 %). <sup>1</sup>H NMR (300 MHz, CDCl<sub>3</sub>,  $\delta$ ): 0.87 (br m, 6n H), 1.27 (m, 14n H), 1.52 (m, 5n H), 3.20 (br m, 4n H), 6.48 (br s, 4n H), 7.34 (br s, 4n H); IR (neat):  $\nu$  = 2954, 2924, 2854, 2208, 2163, 1601, 1520, 1464, 1399, 1366, 1294,

1276, 1254, 1227, 1195, 1135, 1106, 1017, 984, 934, 889, 828, 811, 757, 677, 664, 644, 629, 617, 604  $\text{cm}^{-1}$ . ( $M_n$  (GPC, THF) 51000;  $M_w/M_n$  2.45;  $T_{d5\%}$  385  $^{\circ}\text{C}$ ).

### Fabrication of Layer-by-Layer Films

Polymer solutions (10 mM repeat unit<sup>-1</sup>) were prepared by dissolving polystyrene derivative (**P1**) into toluene and TCNQ polyester (**P2**) into THF. LbL assembly was performed by sequentially spin-coating **P1** and **P2** solutions on a cleaned ITO substrate at 1000 rpm for 60 s followed by heating to 100  $^{\circ}\text{C}$  for 10 min and washing with THF to remove unreacted polymers.

### $\text{Ag}^+$ Ion Recognition

After the multilayer film (6 layers) was soaked into a 0.2 mM  $\text{CF}_3\text{SO}_3\text{Ag}$  solution in 1,2-dichloroethane for 1 min, it was thoroughly washed with 1,2-dichloroethane. The  $\text{Ag}^+$  recognition was investigated by the UV-vis-near IR absorption spectra. Next, this film was soaked into triethylamine for 1 min and thoroughly washed with 1,2-dichloroethane. The  $\text{Ag}^+$  release was investigated by the UV-vis-near IR absorption spectra. A series of the procedure was repeated 5 times.

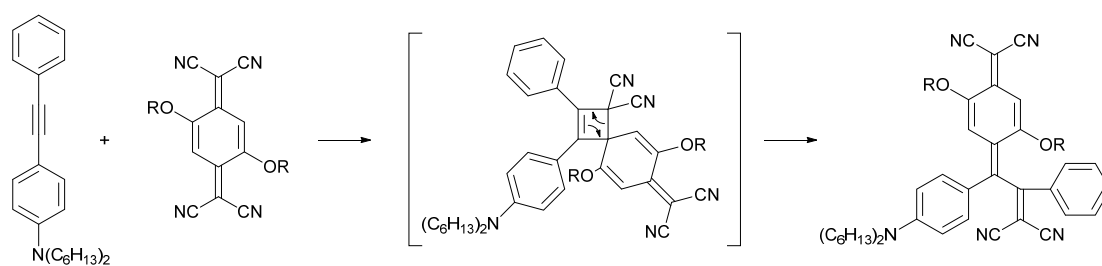

**Scheme S1.** Reaction mechanism of the [2+2] CA-RE between *N,N*-dihexylaniline-substituted alkyne and 7,7,8,8-tetracyanoquinodimethane (TCNQ).

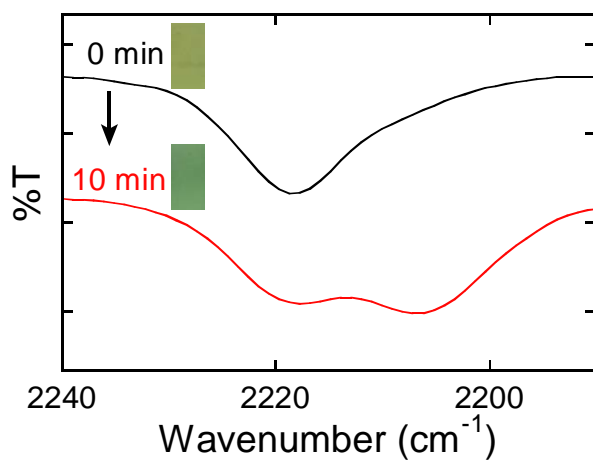

**Figure S1.** IR spectral change and images of the mixed film on the ITO substrate before and after heating at 100 °C for 10 min.

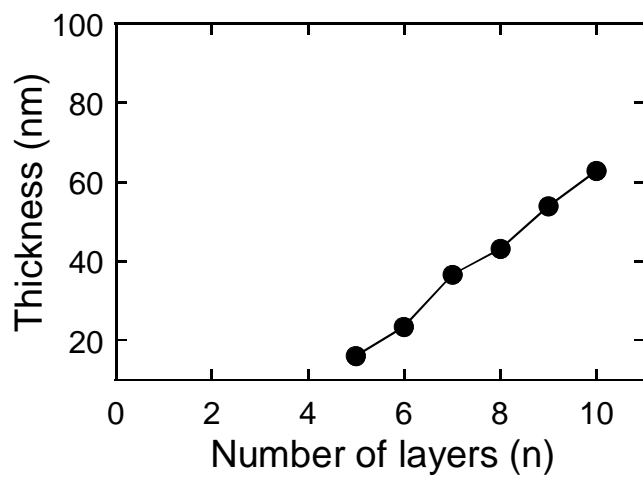

**Figure S2.** Plots of the thickness and layer number during the LbL assembling process of **P1** and **P2**. The thickness of <20 nm could not be reliably determined due to instrumental limitations.

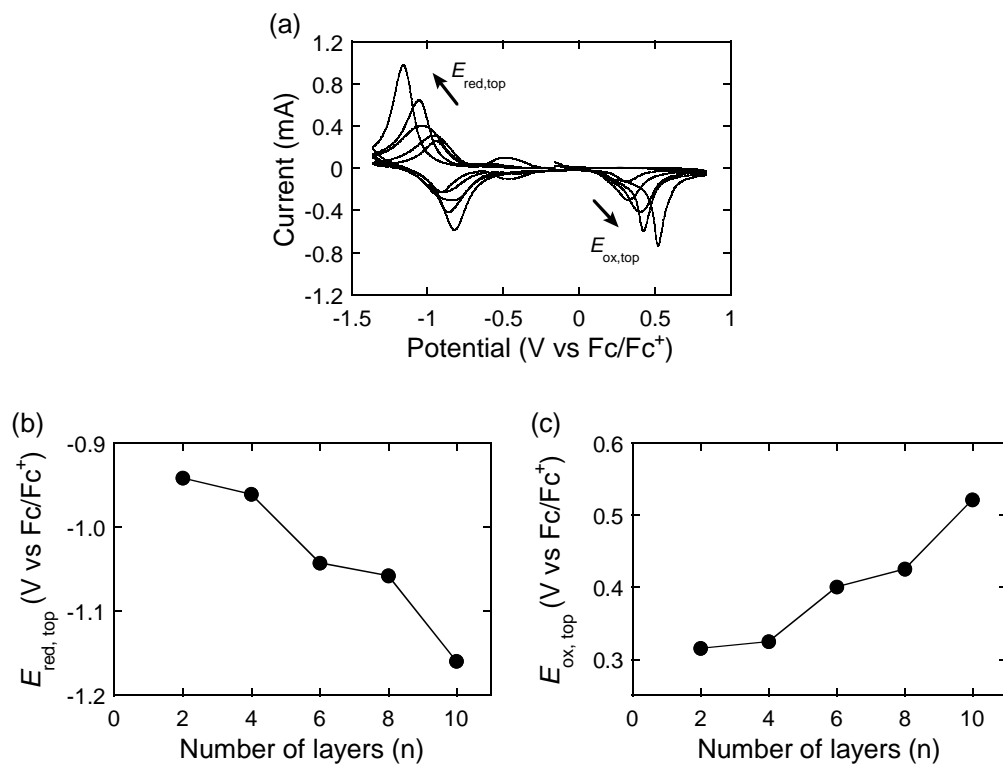

**Figure S3.** (a) CVs of multilayer films on an ITO electrode measured in CH<sub>3</sub>CN with 0.1 M (nC<sub>4</sub>H<sub>9</sub>)<sub>4</sub>NClO<sub>4</sub> at 20 °C and the scan rate of 0.1 Vs<sup>-1</sup>, and the dependence of the layer number on (b) the  $E_{\text{red,top}}$  and (c)  $E_{\text{ox,top}}$  values.

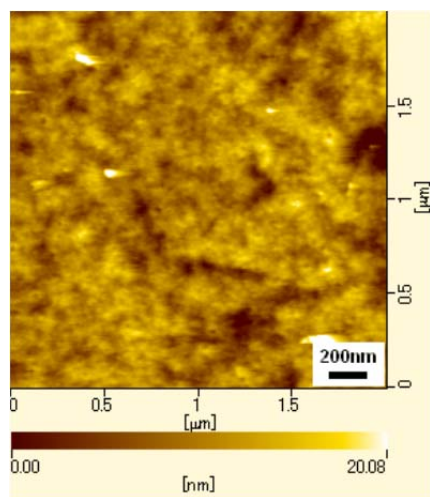

**Figure S4.** AFM (topo) image of 6 layer film.

## References

- 1 Fujita, H.; Michinobu, T.; Tokita, M.; Ueda, M.; Higashihara, T. Synthesis and postfunctionalization of rod-coil diblock and coil-rod-coil triblock copolymers composed of poly(3-hexylthiophene) and poly(4-(4' - *N,N* - dihexylaminophenylethynyl)styrene) segments. *Macromolecules* **2012**, *45* (24), 9643-9656.
- 2 Washino, Y.; Murata, K.; Ashizawa, M.; Kawauchi, S.; Michinobu, T. Creation of persistent charge-transfer interactions in TCNQ polyester. *Polym. J.* **2011**, *43* (4), 364-369.
